# Supplementary material for: Surfactant-enhanced air-agitation liquid–liquid microextraction of polycyclic aromatic hydrocarbons from edible oil using magnetic deep eutectic solvent prior to HPLC determination
Source: Royal Society of Chemistry journal article supplement (doi:10.1039/d3ay01437a), 2023-01-01
Supplement: d3ay01437a1.pdf [file d3ay01437a1.pdf]

### Supplementary data

#### **Surfactant-enhanced air-agitation liquid-liquid microextraction of polycyclic aromatic hydrocarbons from edible oil samples using magnetic deep eutectic solvent prior to HPLC**

Fariba Adib<sup>1,2</sup>, Mohammad Reza Afshar Mogaddam<sup>3, 4,\*</sup>, Mahboob Nemati <sup>1,3, \*</sup>, Mir Ali Farajzadeh<sup>5,6</sup>, Ali Mohebbi<sup>3</sup>, Ali Akbar Alizadeh Nabil<sup>3</sup>

<sup>1</sup>*Department of Food and Drug Control, Faculty of Pharmacy, Tabriz University of Medical Science, Tabriz, Iran*

<sup>2</sup> *Neurosciences Research Center, Tabriz University of Medical Sciences, Tabriz, Iran*

<sup>3</sup> *Food and Drug Safety Research Center, Tabriz University of Medical Science, Tabriz, Iran*

<sup>4</sup> *Pharmaceutical Analysis Research Center, Tabriz University of Medical Science, Tabriz, Iran*

<sup>5</sup> *Department of Analytical Chemistry, Faculty of Chemistry, University of Tabriz, Tabriz, Iran*

<sup>6</sup>*Engineering Faculty, Near East University, 99138 Nicosia, North Cyprus, Mersin 10, Turkey*

\*Corresponding author: Prof. M. Nemati

Email addresses: nematim@tbzmed.ac.ir; mahnema@gmail.com

Corresponding author: Dr. M.R. Afshar Mogaddam

E-mail addresses: mr.afsharmogaddam@yahoo.com; Afsharmogaddam@tbzmed.ac.ir

Tel.: +98 4133372250

Fax: 98 4133344798

Table S1. Experimental factors, levels, and the obtained results for CCD design.

| Variables                              |     | levels     |     |     |     |            |                                                                     |                |            |        |                  |
|----------------------------------------|-----|------------|-----|-----|-----|------------|---------------------------------------------------------------------|----------------|------------|--------|------------------|
|                                        |     | - $\alpha$ | -1  | 0   | +1  | + $\alpha$ |                                                                     |                |            |        |                  |
| (A) Vortexing time (min)               |     | 1          | 2   | 3   | 4   | 5          |                                                                     |                |            |        |                  |
| (B) MDES volume ( $\mu$ L)             |     | 65         | 72  | 78  | 83  | 90         |                                                                     |                |            |        |                  |
| (C) Extraction number                  |     | 1          | 4   | 6   | 7   | 10         |                                                                     |                |            |        |                  |
| (D) SDS solution concentration (% w/v) |     | 0          | 0.3 | 0.5 | 0.7 | 1.0        |                                                                     |                |            |        |                  |
| (E) SDS solution volume ( $\mu$ L)     |     | 0          | 87  | 150 | 213 | 300        |                                                                     |                |            |        |                  |
| Std                                    | Run | A          | B   | C   | D   | E          | Average ER (%) (n=3) obtained from three repeated determinations of |                |            |        |                  |
|                                        |     |            |     |     |     |            | Acenaphthene                                                        | Phentaphthrene | Anthracene | Pyrene | Benzo (a) pyrene |
| 6                                      | 1   | 4          | 72  | 7   | 0.3 | 87         | 34.6                                                                | 30.4           | 29.6       | 27.4   | 28.8             |
| 28                                     | 2   | 4          | 83  | 4   | 0.7 | 213        | 24.5                                                                | 28.2           | 27.5       | 25.4   | 26.7             |
| 14                                     | 3   | 4          | 72  | 7   | 0.7 | 87         | 51.3                                                                | 59.0           | 57.5       | 53.2   | 55.9             |
| 4                                      | 4   | 4          | 83  | 4   | 0.3 | 87         | 53.1                                                                | 61.1           | 59.5       | 55.1   | 57.9             |
| 37                                     | 5   | 3          | 78  | 1   | 0.5 | 150        | 28.0                                                                | 32.2           | 31.4       | 29.1   | 30.6             |
| 1                                      | 6   | 2          | 72  | 4   | 0.3 | 87         | 28.0                                                                | 32.2           | 31.4       | 29.1   | 30.6             |
| 46                                     | 7   | 3          | 78  | 6   | 0.5 | 150        | 35.5                                                                | 40.8           | 39.8       | 36.8   | 38.7             |
| 11                                     | 8   | 2          | 83  | 4   | 0.7 | 87         | 23.3                                                                | 34.7           | 33.8       | 31.3   | 32.9             |
| 32                                     | 9   | 4          | 83  | 7   | 0.7 | 213        | 26.3                                                                | 28.0           | 27.2       | 25.2   | 26.5             |
| 38                                     | 10  | 3          | 78  | 10  | 0.5 | 150        | 29.1                                                                | 33.5           | 32.6       | 30.2   | 31.7             |
| 41                                     | 11  | 3          | 78  | 6   | 0.5 | 0          | 53.4                                                                | 61.4           | 59.8       | 55.4   | 58.2             |
| 29                                     | 12  | 2          | 72  | 7   | 0.7 | 213        | 53.6                                                                | 64.6           | 62.9       | 58.3   | 61.3             |
| 25                                     | 13  | 2          | 72  | 4   | 0.7 | 213        | 39.0                                                                | 39.3           | 38.3       | 35.5   | 37.3             |
| 3                                      | 14  | 2          | 83  | 4   | 0.3 | 87         | 43.9                                                                | 50.5           | 49.2       | 45.5   | 47.9             |
| 33                                     | 15  | 1          | 78  | 6   | 0.5 | 150        | 33.2                                                                | 38.2           | 37.2       | 34.4   | 36.2             |
| 35                                     | 16  | 3          | 65  | 6   | 0.5 | 150        | 45.3                                                                | 52.1           | 50.7       | 47.0   | 49.4             |
| 8                                      | 17  | 4          | 83  | 7   | 0.3 | 87         | 40.3                                                                | 46.3           | 45.1       | 41.8   | 43.9             |
| 27                                     | 18  | 2          | 83  | 4   | 0.7 | 213        | 39.4                                                                | 50.8           | 49.4       | 45.8   | 48.1             |
| 18                                     | 19  | 4          | 72  | 4   | 0.3 | 213        | 34.9                                                                | 40.1           | 39.1       | 36.2   | 38.0             |
| 17                                     | 20  | 2          | 72  | 4   | 0.3 | 213        | 42.3                                                                | 48.6           | 47.4       | 43.9   | 46.1             |
| 43                                     | 21  | 3          | 78  | 6   | 0.5 | 150        | 36.5                                                                | 41.9           | 40.8       | 37.8   | 39.8             |
| 22                                     | 22  | 4          | 72  | 7   | 0.3 | 213        | 39.7                                                                | 48.6           | 47.4       | 43.9   | 46.1             |
| 50                                     | 23  | 3          | 78  | 6   | 0.5 | 150        | 32.6                                                                | 28.2           | 27.5       | 25.4   | 26.7             |
| 23                                     | 24  | 2          | 83  | 7   | 0.3 | 213        | 77.1                                                                | 88.7           | 86.4       | 79.9   | 84.0             |
| 39                                     | 25  | 3          | 78  | 6   | 0.0 | 150        | 52.0                                                                | 59.8           | 58.2       | 53.9   | 56.7             |
| 42                                     | 26  | 3          | 78  | 6   | 0.5 | 300        | 74.1                                                                | 85.2           | 83.0       | 76.8   | 80.8             |
| 9                                      | 27  | 2          | 72  | 4   | 0.7 | 87         | 30.9                                                                | 28.2           | 27.5       | 25.4   | 26.7             |
| 10                                     | 28  | 4          | 72  | 4   | 0.7 | 87         | 56.4                                                                | 64.8           | 63.1       | 58.5   | 61.5             |
| 45                                     | 29  | 3          | 78  | 6   | 0.5 | 150        | 33.7                                                                | 38.8           | 37.8       | 35.0   | 36.7             |
| 12                                     | 30  | 4          | 83  | 4   | 0.7 | 87         | 26.4                                                                | 30.4           | 29.6       | 27.4   | 28.8             |
| 34                                     | 31  | 5          | 78  | 6   | 0.5 | 150        | 36.5                                                                | 41.9           | 40.8       | 37.8   | 39.8             |
| 24                                     | 32  | 4          | 83  | 7   | 0.3 | 213        | 53.7                                                                | 68.1           | 66.3       | 61.4   | 64.5             |
| 30                                     | 33  | 4          | 72  | 7   | 0.7 | 213        | 44.6                                                                | 51.3           | 50.0       | 46.3   | 48.6             |
| 7                                      | 34  | 2          | 83  | 7   | 0.3 | 87         | 44.0                                                                | 50.6           | 49.3       | 45.6   | 48.0             |
| 26                                     | 35  | 4          | 72  | 4   | 0.7 | 213        | 36.5                                                                | 42.0           | 40.9       | 37.8   | 39.8             |
| 13                                     | 36  | 2          | 72  | 7   | 0.7 | 87         | 30.8                                                                | 35.4           | 34.5       | 31.9   | 33.6             |
| 16                                     | 37  | 4          | 83  | 7   | 0.7 | 87         | 23.5                                                                | 27.0           | 26.3       | 24.4   | 25.6             |
| 2                                      | 38  | 4          | 72  | 4   | 0.3 | 87         | 47.3                                                                | 54.4           | 53.0       | 49.0   | 51.5             |
| 48                                     | 39  | 3          | 78  | 6   | 0.5 | 150        | 31.2                                                                | 35.9           | 34.9       | 32.4   | 34.0             |
| 31                                     | 40  | 2          | 83  | 7   | 0.7 | 213        | 48.2                                                                | 55.4           | 54.0       | 50.0   | 52.5             |
| 47                                     | 41  | 3          | 78  | 6   | 0.5 | 150        | 35.0                                                                | 40.3           | 39.2       | 36.3   | 38.1             |
| 5                                      | 42  | 2          | 72  | 7   | 0.3 | 87         | 20.6                                                                | 19.8           | 19.3       | 17.8   | 18.7             |
| 40                                     | 43  | 3          | 78  | 6   | 1.0 | 150        | 28.2                                                                | 32.4           | 31.6       | 29.2   | 30.7             |
| 20                                     | 44  | 4          | 83  | 4   | 0.3 | 213        | 52.4                                                                | 60.3           | 58.7       | 54.3   | 57.1             |
| 36                                     | 45  | 3          | 90  | 6   | 0.5 | 150        | 42.3                                                                | 48.6           | 47.4       | 43.9   | 46.1             |
| 49                                     | 46  | 3          | 78  | 6   | 0.5 | 150        | 32.6                                                                | 43.5           | 42.3       | 39.2   | 41.2             |
| 21                                     | 47  | 2          | 72  | 7   | 0.3 | 213        | 52.8                                                                | 68.1           | 66.3       | 61.4   | 64.5             |
| 19                                     | 48  | 2          | 83  | 4   | 0.3 | 213        | 70.1                                                                | 80.6           | 78.5       | 72.7   | 76.4             |
| 44                                     | 49  | 3          | 78  | 6   | 0.5 | 150        | 43.0                                                                | 30.7           | 29.9       | 27.7   | 29.1             |
| 15                                     | 50  | 2          | 83  | 7   | 0.7 | 87         | 20.8                                                                | 23.9           | 23.3       | 21.6   | 22.7             |

Table S2. Results of ANOVA for CCD design for acenaphthene.

| Source               | Sum of Squares | df | Mean Square | F-value | p-value  |                 |
|----------------------|----------------|----|-------------|---------|----------|-----------------|
| <b>Model</b>         | 8067.09        | 20 | 403.35      | 55.97   | < 0.0001 | Significant     |
| A-Vortexing time     | 3.08           | 1  | 3.08        | 0.4275  | 0.5184   |                 |
| B-Solvent volume     | 6.34           | 1  | 6.34        | 0.8791  | 0.3562   |                 |
| C-Extraction number  | 5.99           | 1  | 5.99        | 0.8309  | 0.3695   |                 |
| D-Surfactant percent | 1076.04        | 1  | 1076.04     | 149.30  | < 0.0001 |                 |
| E-Surfactant volume  | 1010.82        | 1  | 1010.82     | 140.26  | < 0.0001 |                 |
| AB                   | 404.89         | 1  | 404.89      | 56.18   | < 0.0001 |                 |
| AC                   | 73.68          | 1  | 73.68       | 10.22   | 0.0033   |                 |
| AD                   | 21.95          | 1  | 21.95       | 3.05    | 0.0915   |                 |
| AE                   | 1254.00        | 1  | 1254.00     | 174.00  | < 0.0001 |                 |
| BC                   | 4.55           | 1  | 4.55        | 0.6307  | 0.4336   |                 |
| BD                   | 1874.86        | 1  | 1874.86     | 260.14  | < 0.0001 |                 |
| BE                   | 166.23         | 1  | 166.23      | 23.07   | < 0.0001 |                 |
| CD                   | 32.06          | 1  | 32.06       | 4.45    | 0.0437   |                 |
| CE                   | 315.35         | 1  | 315.35      | 43.76   | < 0.0001 |                 |
| DE                   | 121.87         | 1  | 121.87      | 16.91   | 0.0003   |                 |
| A <sup>2</sup>       | 0.3539         | 1  | 0.3539      | 0.0491  | 0.8262   |                 |
| B <sup>2</sup>       | 125.87         | 1  | 125.87      | 17.47   | 0.0002   |                 |
| C <sup>2</sup>       | 78.31          | 1  | 78.31       | 10.87   | 0.0026   |                 |
| D <sup>2</sup>       | 40.24          | 1  | 40.24       | 5.58    | 0.0251   |                 |
| E <sup>2</sup>       | 1406.87        | 1  | 1406.87     | 195.21  | < 0.0001 |                 |
| <b>Residual</b>      | 209.00         | 29 | 7.21        |         |          |                 |
| Lack of Fit          | 115.77         | 22 | 5.26        | 0.3951  | 0.9548   | Not significant |
| Pure Error           | 93.24          | 7  | 13.32       |         |          |                 |
| <b>Cor Total</b>     | 8276.09        | 49 |             |         |          |                 |

Table S3. Results of ANOVA for CCD design for phentaphtrene.

| Source               | Sum of Squares | df | Mean Square | F-value | p-value  |                 |
|----------------------|----------------|----|-------------|---------|----------|-----------------|
| <b>Model</b>         | 11626.99       | 20 | 581.35      | 19.98   | < 0.0001 | Significant     |
| A-Vortexing time     | 11.89          | 1  | 11.89       | 0.4089  | 0.5276   |                 |
| B-Solvent volume     | 56.15          | 1  | 56.15       | 1.93    | 0.1753   |                 |
| C-Extraction number  | 11.02          | 1  | 11.02       | 0.3790  | 0.5430   |                 |
| D-Surfactant percent | 1446.49        | 1  | 1446.49     | 49.73   | < 0.0001 |                 |
| E-Surfactant volume  | 1691.05        | 1  | 1691.05     | 58.13   | < 0.0001 |                 |
| AB                   | 614.72         | 1  | 614.72      | 21.13   | < 0.0001 |                 |
| AC                   | 128.05         | 1  | 128.05      | 4.40    | 0.0447   |                 |
| AD                   | 24.72          | 1  | 24.72       | 0.8498  | 0.3642   |                 |
| AE                   | 1617.49        | 1  | 1617.49     | 55.60   | < 0.0001 |                 |
| BC                   | 40.42          | 1  | 40.42       | 1.39    | 0.2481   |                 |
| BD                   | 2280.03        | 1  | 2280.03     | 78.38   | < 0.0001 |                 |
| BE                   | 101.38         | 1  | 101.38      | 3.49    | 0.0721   |                 |
| CD                   | 35.20          | 1  | 35.20       | 1.21    | 0.2804   |                 |
| CE                   | 673.13         | 1  | 673.13      | 23.14   | < 0.0001 |                 |
| DE                   | 323.61         | 1  | 323.61      | 11.12   | 0.0023   |                 |
| A <sup>2</sup>       | 11.15          | 1  | 11.15       | 0.3832  | 0.5407   |                 |
| B <sup>2</sup>       | 286.46         | 1  | 286.46      | 9.85    | 0.0039   |                 |
| C <sup>2</sup>       | 37.87          | 1  | 37.87       | 1.30    | 0.2632   |                 |
| D <sup>2</sup>       | 128.10         | 1  | 128.10      | 4.40    | 0.0447   |                 |
| E <sup>2</sup>       | 2223.84        | 1  | 2223.84     | 76.45   | < 0.0001 |                 |
| <b>Residual</b>      | 843.60         | 29 | 29.09       |         |          | Not significant |
| Lack of Fit          | 632.88         | 22 | 28.77       | 0.9557  | 0.5713   |                 |
| Pure Error           | 210.71         | 7  | 30.10       |         |          |                 |
| <b>Cor Total</b>     | 12470.59       | 49 |             |         |          |                 |

Table S4. Results of ANOVA for CCD design for anthracene.

| Source                       | Sum of Squares | df | Mean Square | F-value | p-value  |                 |
|------------------------------|----------------|----|-------------|---------|----------|-----------------|
| <b>Model</b>                 | 11028.28       | 20 | 551.41      | 19.98   | < 0.0001 | significant     |
| A-Vortexing time             | 11.28          | 1  | 11.28       | 0.4089  | 0.5276   |                 |
| B-MDES volume                | 53.26          | 1  | 53.26       | 1.93    | 0.1753   |                 |
| C-Extraction number          | 10.46          | 1  | 10.46       | 0.3790  | 0.5430   |                 |
| D-SDS solution concentration | 1372.01        | 1  | 1372.01     | 49.73   | < 0.0001 |                 |
| E-SDS solution volume        | 1603.98        | 1  | 1603.98     | 58.13   | < 0.0001 |                 |
| AB                           | 583.06         | 1  | 583.06      | 21.13   | < 0.0001 |                 |
| AC                           | 121.46         | 1  | 121.46      | 4.40    | 0.0447   |                 |
| AD                           | 23.45          | 1  | 23.45       | 0.8498  | 0.3642   |                 |
| AE                           | 1534.20        | 1  | 1534.20     | 55.60   | < 0.0001 |                 |
| BC                           | 38.34          | 1  | 38.34       | 1.39    | 0.2481   |                 |
| BD                           | 2162.63        | 1  | 2162.63     | 78.38   | < 0.0001 |                 |
| BE                           | 96.16          | 1  | 96.16       | 3.49    | 0.0721   |                 |
| CD                           | 33.39          | 1  | 33.39       | 1.21    | 0.2804   |                 |
| CE                           | 638.47         | 1  | 638.47      | 23.14   | < 0.0001 |                 |
| DE                           | 306.95         | 1  | 306.95      | 11.12   | 0.0023   |                 |
| A <sup>2</sup>               | 10.57          | 1  | 10.57       | 0.3832  | 0.5407   |                 |
| B <sup>2</sup>               | 271.71         | 1  | 271.71      | 9.85    | 0.0039   |                 |
| C <sup>2</sup>               | 35.92          | 1  | 35.92       | 1.30    | 0.2632   |                 |
| D <sup>2</sup>               | 121.50         | 1  | 121.50      | 4.40    | 0.0447   |                 |
| E <sup>2</sup>               | 2109.32        | 1  | 2109.32     | 76.45   | < 0.0001 |                 |
| <b>Residual</b>              | 800.16         | 29 | 27.59       |         |          |                 |
| Lack of Fit                  | 600.29         | 22 | 27.29       | 0.9557  | 0.5713   | not significant |
| Pure Error                   | 199.86         | 7  | 28.55       |         |          |                 |
| <b>Cor Total</b>             | 11828.43       | 49 |             |         |          |                 |

Table S5. Results of ANOVA for CCD design for pyrene.

| Source                       | Sum of Squares | df | Mean Square | F-value | p-value  |                 |
|------------------------------|----------------|----|-------------|---------|----------|-----------------|
| <b>Model</b>                 | 9452.47        | 20 | 472.62      | 19.98   | < 0.0001 | significant     |
| A-Vortexing time             | 9.67           | 1  | 9.67        | 0.4089  | 0.5276   |                 |
| B-MDES volume                | 45.65          | 1  | 45.65       | 1.93    | 0.1753   |                 |
| C-Extraction number          | 8.96           | 1  | 8.96        | 0.3790  | 0.5430   |                 |
| D-SDS solution concentration | 1175.97        | 1  | 1175.97     | 49.73   | < 0.0001 |                 |
| E-SDS solution volume        | 1374.79        | 1  | 1374.79     | 58.13   | < 0.0001 |                 |
| AB                           | 499.75         | 1  | 499.75      | 21.13   | < 0.0001 |                 |
| AC                           | 104.10         | 1  | 104.10      | 4.40    | 0.0447   |                 |
| AD                           | 20.10          | 1  | 20.10       | 0.8498  | 0.3642   |                 |
| AE                           | 1314.98        | 1  | 1314.98     | 55.60   | < 0.0001 |                 |
| BC                           | 32.86          | 1  | 32.86       | 1.39    | 0.2481   |                 |
| BD                           | 1853.61        | 1  | 1853.61     | 78.38   | < 0.0001 |                 |
| BE                           | 82.42          | 1  | 82.42       | 3.49    | 0.0721   |                 |
| CD                           | 28.62          | 1  | 28.62       | 1.21    | 0.2804   |                 |
| CE                           | 547.24         | 1  | 547.24      | 23.14   | < 0.0001 |                 |
| DE                           | 263.09         | 1  | 263.09      | 11.12   | 0.0023   |                 |
| A <sup>2</sup>               | 9.06           | 1  | 9.06        | 0.3832  | 0.5407   |                 |
| B <sup>2</sup>               | 232.88         | 1  | 232.88      | 9.85    | 0.0039   |                 |
| C <sup>2</sup>               | 30.78          | 1  | 30.78       | 1.30    | 0.2632   |                 |
| D <sup>2</sup>               | 104.14         | 1  | 104.14      | 4.40    | 0.0447   |                 |
| E <sup>2</sup>               | 1807.93        | 1  | 1807.93     | 76.45   | < 0.0001 |                 |
| <b>Residual</b>              | 685.82         | 29 | 23.65       |         |          |                 |
| Lack of Fit                  | 514.52         | 22 | 23.39       | 0.9557  | 0.5713   | not significant |
| Pure Error                   | 171.30         | 7  | 24.47       |         |          |                 |
| <b>Cor Total</b>             | 10138.29       | 49 |             |         |          |                 |

Table S6. Results of ANOVA for CCD design for benzo (a) pyrene.

| Source                       | Sum of Squares | df | Mean Square | F-value | p-value  |                 |
|------------------------------|----------------|----|-------------|---------|----------|-----------------|
| <b>Model</b>                 | 10445.39       | 20 | 522.27      | 19.98   | < 0.0001 | Significant     |
| A-Vortexing time             | 10.68          | 1  | 10.68       | 0.4089  | 0.5276   |                 |
| B-MDES volume                | 50.44          | 1  | 50.44       | 1.93    | 0.1753   |                 |
| C-Extraction number          | 9.90           | 1  | 9.90        | 0.3790  | 0.5430   |                 |
| D-SDS solution concentration | 1299.49        | 1  | 1299.49     | 49.73   | < 0.0001 |                 |
| E-SDS solution volume        | 1519.20        | 1  | 1519.20     | 58.13   | < 0.0001 |                 |
| AB                           | 552.25         | 1  | 552.25      | 21.13   | < 0.0001 |                 |
| AC                           | 115.04         | 1  | 115.04      | 4.40    | 0.0447   |                 |
| AD                           | 22.21          | 1  | 22.21       | 0.8498  | 0.3642   |                 |
| AE                           | 1453.11        | 1  | 1453.11     | 55.60   | < 0.0001 |                 |
| BC                           | 36.31          | 1  | 36.31       | 1.39    | 0.2481   |                 |
| BD                           | 2048.32        | 1  | 2048.32     | 78.38   | < 0.0001 |                 |
| BE                           | 91.07          | 1  | 91.07       | 3.49    | 0.0721   |                 |
| CD                           | 31.62          | 1  | 31.62       | 1.21    | 0.2804   |                 |
| CE                           | 604.72         | 1  | 604.72      | 23.14   | < 0.0001 |                 |
| DE                           | 290.73         | 1  | 290.73      | 11.12   | 0.0023   |                 |
| A <sup>2</sup>               | 10.02          | 1  | 10.02       | 0.3832  | 0.5407   |                 |
| B <sup>2</sup>               | 257.35         | 1  | 257.35      | 9.85    | 0.0039   |                 |
| C <sup>2</sup>               | 34.02          | 1  | 34.02       | 1.30    | 0.2632   |                 |
| D <sup>2</sup>               | 115.08         | 1  | 115.08      | 4.40    | 0.0447   |                 |
| E <sup>2</sup>               | 1997.84        | 1  | 1997.84     | 76.45   | < 0.0001 |                 |
| <b>Residual</b>              | 757.86         | 29 | 26.13       |         |          |                 |
| Lack of Fit                  | 568.56         | 22 | 25.84       | 0.9557  | 0.5713   | Not significant |
| Pure Error                   | 189.30         | 7  | 27.04       |         |          |                 |
| <b>Cor Total</b>             | 11203.25       | 49 |             |         |          |                 |
